# Supplementary material
Source: PubMed Central journal article supplement (PMC4858477)
Supplement: CJN.06300615_CJN06300615SupplementaryData1.pdf [file CJN.06300615_CJN06300615SupplementaryData1.pdf]

## **Supplemental Material**

### **EFFECT OF TOLVAPTAN IN ADPKD BY CKD STAGE: RESULTS FROM THE TEMPO 3:4 TRIAL**

Vicente E. Torres, MD, PhD, Eiji Higashihara, MD, PhD, Olivier Devuyst, MD, PhD, Arlene B. Chapman, MD, Ron T. Gansevoort, MD, PhD, Jared J. Grantham, MD, Ronald D. Perrone, MD, John Ouyang, PhD, Jaime D. Blais, PhD, and Frank S. Czerwiec MD, PhD, for the TEMPO 3:4 Trial Investigators\*

From the Division of Nephrology and Hypertension, Department of Internal Medicine, Mayo Clinic, Rochester, Minnesota (V.E.T.); Department of Urology, Kyorin University School of Medicine, Mitaka, Japan (E.H.); Division of Nephrology, Cliniques Universitaires St. Luc, Université catholique de Louvain Medical School, Brussels, Belgium; Institute of Physiology, Zurich Center for Integrative Human Physiology (ZIHP), University of Zurich, Zurich, Switzerland (O.D.); Section of Nephrology, Department of Medicine, University of Chicago, Chicago, Illinois (A.B.C.); Division of Nephrology, Department of Internal Medicine, University Medical Center Groningen, University of Groningen, Groningen, the Netherlands (R.T.G); Kidney Institute and the Department of Internal Medicine, Kansas University Medical Center, Kansas City, Kansas (J.J.G.); Department of Medicine, Division of Nephrology, Tufts Medical Center, Tufts University School of Medicine, Boston, Massachusetts (R.D.P.); Otsuka Pharmaceutical Development & Commercialization, Inc., Rockville, Maryland (J.O., J.D.B., F.S.C).

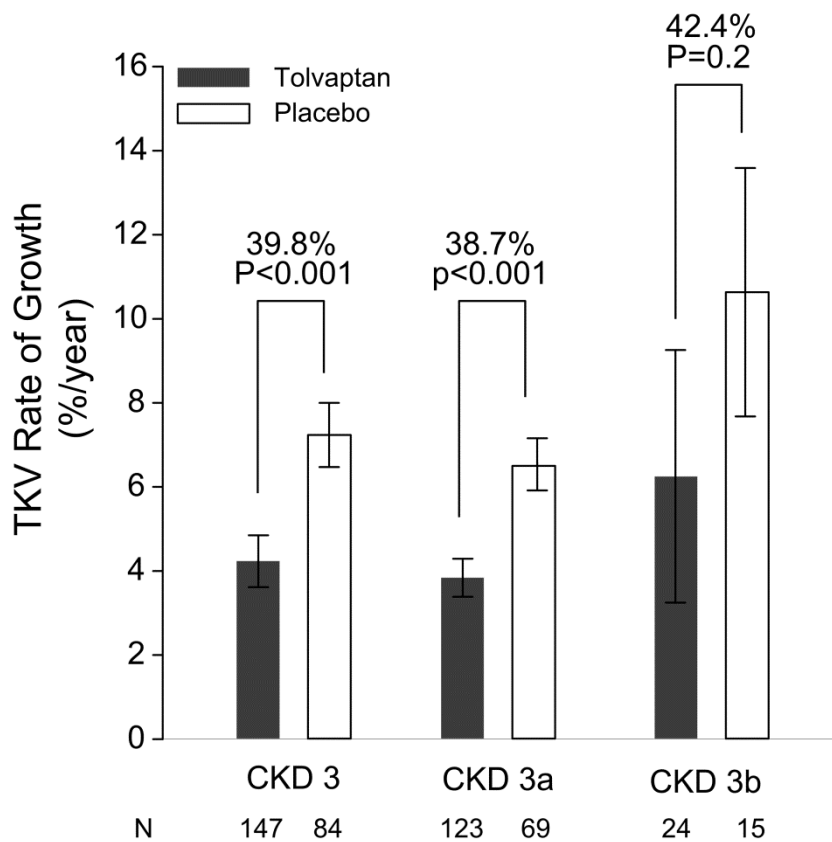

**S1:** Annualized percent changes in total kidney volume in the intention-to-treat population during the 3-year treatment period by CKD stages 3a and 3b and by treatment arm (black bars = tolvaptan, white bars = placebo; means  $\pm$  SEM). The relative treatment effects (39.8, 38.7 and 42.4%) according to CKD stage subgroup, are based on the between-group difference in the slopes, with variance approximated by means of the delta method under the assumption of independence between the slopes is indicated.

S2: Effects of Tolvaptan on the Time to Multiple Investigator-Assessed ADPKD Related Progression Events Hazard ratios for two of the components of the composite end point

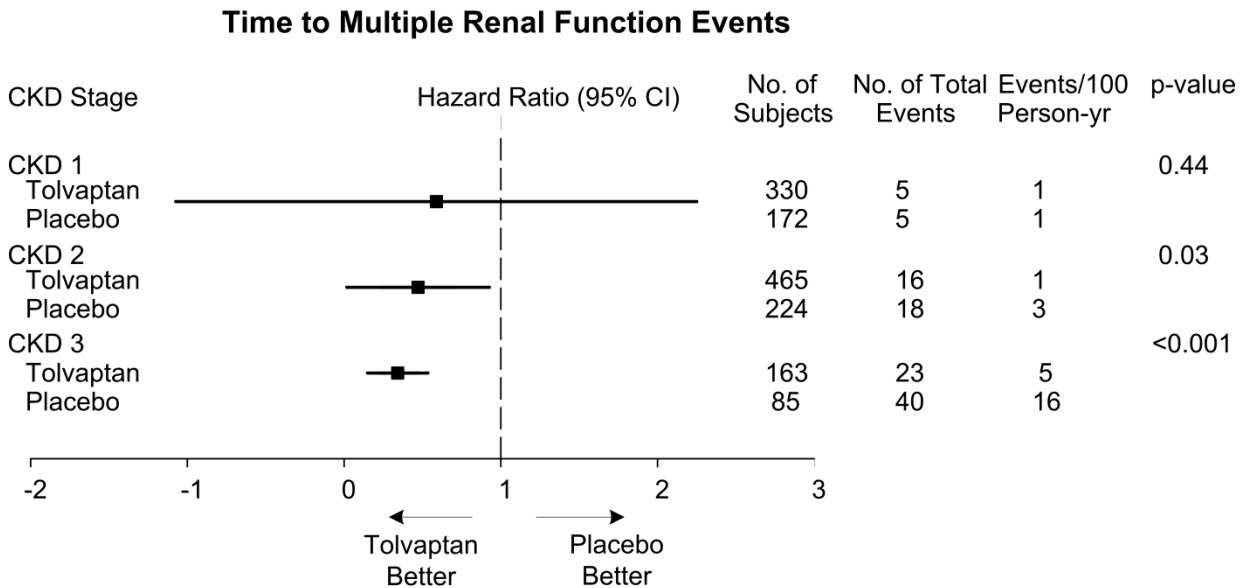

(A) Cumulative hazard of multiple events of worsening renal function defined as worsening kidney function (a 25% reduction in the reciprocal of the serum creatinine level from the value at the end of the dose-adjustment period, reproduced after at least 2 weeks).

### Time to Multiple Renal Pain Events

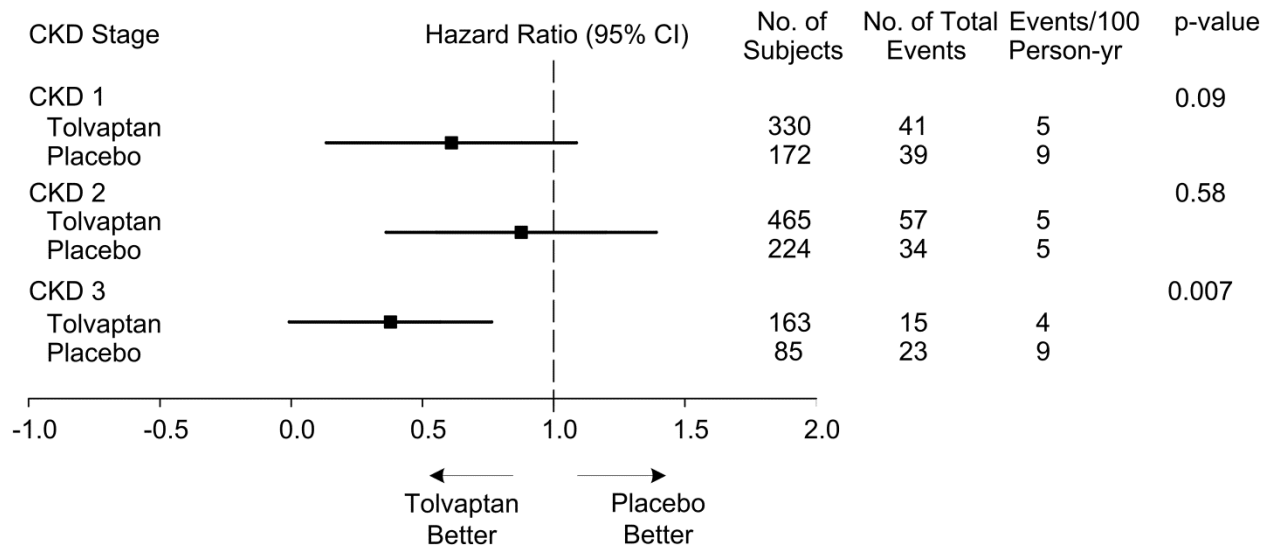

(B) Cumulative hazard of multiple events of clinically significant kidney pain defined as significant interventions for relief of renal pain. This included surgical or invasive radiological procedures, introduction or increasing the dose of narcotic or tricyclic antidepressant medication, prescribing medical leave or activity restrictions or using a prescription nonnarcotic which carries some risk (eg: NSAIDs).

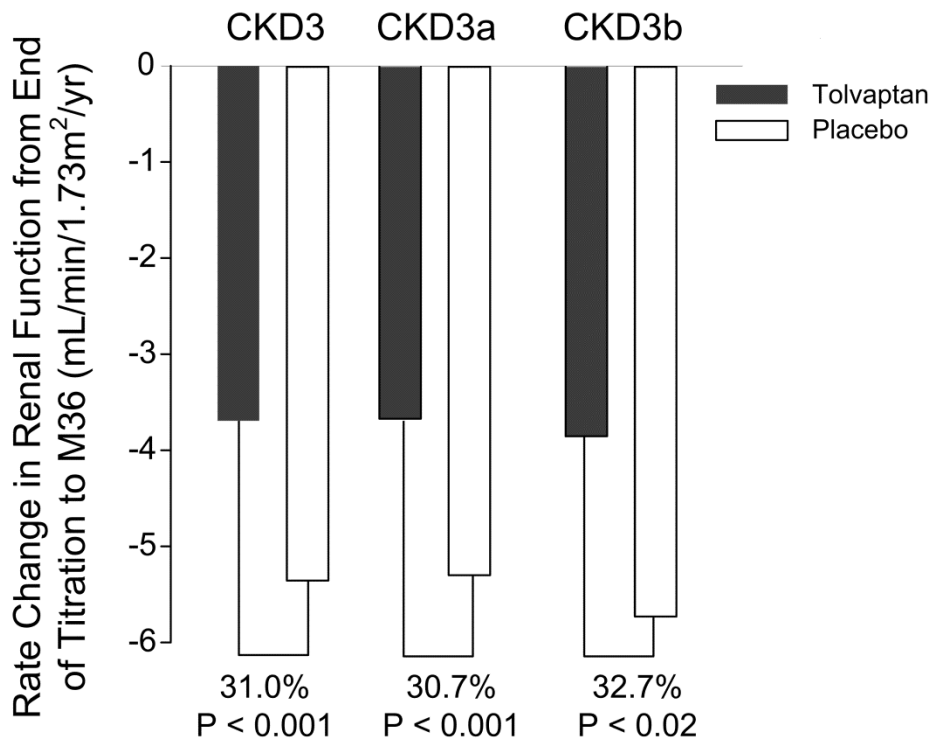

**S3:** On-treatment slopes with 95% CI of CKD-EPI eGFR by CKD stages 3a and 3b and by treatment arm in the intention-to-treat population within the treatment period (black bars = tolvaptan and white bars = placebo). The relative treatment effects (31.0, 30.7 and 32.7%) according to CKD stage subgroup, based on the difference in annual change in slope, are shown.

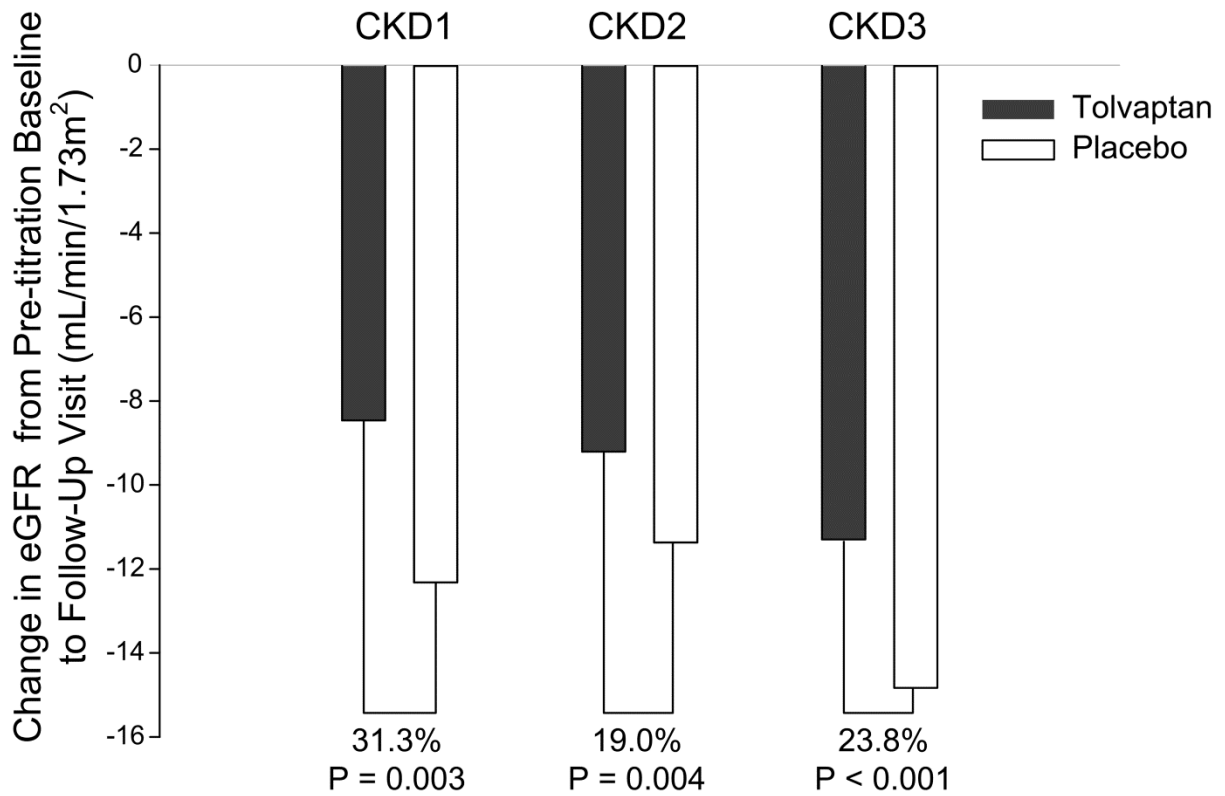

**S4:** Changes in eGFR from pre-titration baseline to follow-up visit 2 plotted by CKD stage and treatment arm (black bars = tolvaptan and white bars = placebo). Relative percent treatment effects (31.3, 19.0 and 23.8%) are shown for each CKD stage.

### **TEMPO 3:4 Trial Investigators and Clinical Sites**

**Argentina:** G. Diez, *Hospital Italiano de Buenos Aires, Buenos Aires*; J. De La Fuente, *Hospital Privado — Centro Médico de Córdoba, Córdoba*; R. Martin, *Hospital Universitario Austral, Buenos Aires*; P. Massari, *Hospital Privado — Centro Médico de Córdoba, Córdoba*; P. Novoa, *Sanatorio Allende, Córdoba*; M. Rial, *Instituto de Nefrología Nephrology S.A., Buenos Aires*; A. Wasserman, *Hospital Municipal de Vicente López, Dr. Bernardo Houssay, Buenos Aires*. **Australia:** R. Faull, *Royal Adelaide Hospital, Adelaide, SA*; I. Fraser, *Melbourne Renal Research Group, Melbourne, VIC*; D Johnson, *Princess Alexandra Hospital, Woolloongabba, QLD*; E. Pedagogos, *Royal Melbourne Hospital, Melbourne, VIC*; C. Pollock, *Royal North Shore Hospital, Sydney, NSW*; G. Rangan, *Westmead Hospital, Sydney, NSW*; S. Roger, *Gosford, Renal Research, NSW*; G. Russ, *Queen Elizabeth Hospital, Adelaide, SA*; M. Thomas, *Royal Perth Hospital, Perth, WA*; R. Walker, *Royal Melbourne Hospital, Melbourne, VIC*. **Belgium:** O. Devuyst, *UCL-Saint-Luc, Brussels*; P. Peeters, *UZ Gent, Gent*; P. Van der Niepen, *UZ Brussel, Brussels*. **Canada:** P. Barre, *Royal Victoria Hospital, Montréal, Québec*; D. Bichet, *Hôpital du Sacre-Coeur de Montréal, Montréal, Québec*; S. Soroka, *Queen Elizabeth II Health Science Centre, Halifax, Nova Scotia*. **Denmark:** H. Dieperink, *Odense University Hospital, Odense*; S. Strandgaard, *Herlev Amtssygehus, Herlev*. **France:** F. Berthoux, *CHU — Hôpital Nord, Saint-Etienne*; B. Canaud, *CHU — Hôpital Lapeyronie, Montpellier*; D. Chauveau, *Hôpital Rangueil, Toulouse*; C. Combe, *CHU-Hôpital Pellegrin, Bordeaux*; B. Dussol, *Hôpital de la Conception, Marseille*; A. Gontiers-Picard, *CHU Montpellier-Hôpital Lapeyronie, Montpellier*; M. Laville, *Hôpital Edouard Herriot, Lyon*; F. Mignon, *Hôpital Bichat-Claude Bernard, Paris*; P. Rieu, *Centre Hospitalier Universitaire, Reims*; J. P. Ryckelynck, *CHU — Hôpital Clemenceau, Caen*. **Germany:** F. H. Dellanna, *Nephrologische Gemeinschaftspraxis, Düsseldorf*; P. Gross, *Universitätsklinikum Carl Gustav Carus, Dresden*; T. Feldkamp, *Klinik für Nephrologie, Essen*; J. Nurnberger, *Klinik für Nephrologie, Essen*; B. D. Schulze, *UH Erlangen/Nuernberg, Nurnberg*; G. Walz, *Universitätsklinikum Freiburg, Freiburg*; M. Zeier, *Universitätsklinik Heidelberg, Heidelberg*. **Italy:** S. Bianchi, *UO Nefrologia, Livorno*; G. Capasso, *Policlinico, Napoli*; R. Magistroni, *Policlinico di Modena, Modena*; P. Manunta, *Università Vita e Salute, Milano*; G. Remuzzi, *Ospedali Riuniti di Bergamo, Bergamo*; G. Villa, *IRCCS Fondazione Salvatore Maugeri, Pavi*. **Japan:** K. Asahi, *Fukushima Medical University Hospital, Fukushima*; M. Endo, *Tokai University Hospital, Kanagawa*; Y. Fujigaki, *Hamamatsu University School of Medicine, Shizuoka*; A. Fukatsu, *Kyoto University Hospital, Kyoto*; H. Hasegawa, *Saitama Medical Center, Saitama*; M. Hasegawa, *Fujita Health University Hospital, Aichi*; Y. Hiki, *Fujita Health University Hospital, Toyoake*; S. Horie, *Teikyo University Hospital, Tokyo*; T. Hosoya, *The Jikei University Hospital, Tokyo*; N. Iehara, *Kyoto University Hospital, Kyoto*; Y. Iino, *Nippon Medical School Hospital, Tokyo*; E. Imai, *Osaka University*

Hospital, Osaka; Y. Isaka, Osaka University Hospital, Osaka; E. Ishimura, Osaka City University Hospital, Osaka; S. Ito, Tohoku University Hospital, Miyagi; K. Kamata, Kitasato University Hospital, Kanagawa; K. Kamura, National Hospital Organization Chiba-East Hospital, Chiba; T. Kato, Fukushima Medical University Hospital, Fukushima; E. Kusano, Jichi Medical School Hospital, Tochigi; M. Kuwahara, Shuwa General Hospital, Saitama; A. Matsubara, Hiroshima University Hospital, Hiroshima; T. Mochizuki, Hokkaido University Hospital, Hokkaido; S. Muto, Teikyo University Hospital, Tokyo; I. Narita, Niigata University Medical and Dental Hospital, Niigata; Y. Naya, Chiba University Hospital, Chiba; N. Nihei, Chiba University Hospital, Chiba; S. Nishio, Hokkaido University Hospital, Hokkaido; K. Nitta, Tokyo Women's Medical University Hospital, Tokyo; K. Nutahara, Kyorin University Hospital, Tokyo; M. Okamura, Ohno Memorial Hospital, Osaka; S. Sasaki, Tokyo Medical and Dental University, Tokyo; K. Seta, National Hospital Organization Kyoto Medical Center, Kyoto; S. Shibazaki, Hokkaido University Hospital, Hokkaido; A. Sugawara, National Hospital Organization Kyoto Medical Center, Kyoto; S. Sugiyama, Fujita Health University Hospital, Aichi; K. Tabei, Saitama Medical Center Jichi Medical University, Saitama; K. Takaichi, Toranomon Hospital, Tokyo; K. Tomita, Kumamoto University Hospital, Kumamoto; Y. Tsukamoto, Shuwa General Hospital, Saitama; K. Tsuruya, Kyushu University Hospital, Fukuoka; Y. Ubara, Toranomon Hospital Kajigaya, Kanagawa; T. Watanabe, Fukushima Medical University Hospital, Fukushima; T. Yamamoto, Hamamatsu University School of Medicine, Shizuoka; N. Yorioka, Hiroshima University Hospital, Hiroshima; K. Yoshida, Kitasato University Hospital, Kanagawa; Y. Yuzawa, Fujita Health University Hospital, Aichi. **Netherlands:** R. Gansevoort, University of Groningen, Groningen; M. Vervloet, VU Medisch Centrum, Amsterdam. **Poland:** K. Ciechanowski, Samodzielny Publiczny Szpital Kliniczny, Szczecin. M. Gutowska-Jablonska, SPZOZ Szpital Praski, Warszawa; W. Klatko, Oddział Nefrologiczny Stacja Dializ, Ciechanow; M. Klinger, Academia Medyczna-Wroclaw, Wroclaw; A. Ksiazek, Samodzielny Publiczny Szpital Kliniczny Nr 4 w Lublinie, Lublin; R. Malecki, Międzyleski Szpital Specjalistyczny w Warszawie, Warszawa; M. Nowicki, SP ZOZ Uniwersytetu Medycznego w Lodzi, Lodz; B. Rutkowski, Akademickie Centrum Kliniczne AMG, Gdansk; A. Rydzewski, Klinika Chorób Wewnętrznych i Nefrologii, Warszawa; W. Sulowicz, Szpital Uniwersytecki w Krakowie, Krakow. **Romania:** A. Covic, Spitalul Clinic "C.I.Parhon", Iasi, G. Mircescu, Spitalul Clinic de Nefrologie "Dr. Carol Davila", Bucharest, M. Voiculescu, Institutul Clinic Fundeni, Bucuresti; **Russian Federation:** O. Barbarash, Kemerovo Regional Clinical Hospital, Kemerovo, S. Borovoy, Leningrad Regional Clinical Hospital, St.Petersburg, L. Demina, The Municipal Health Institution, Novosibirsk, G. Shostka, City Mariinskiy Hospital, St. Petersburg, L. Tkalich, Tomsk Regional Clinical Hospital, Tomsk, N. Tomilina, State Public Health Institution of Moscow, Moscow; **United Kingdom:** L. Foggensteiner, Queen Elizabeth Hospital, Birmingham, S. Holt, Brighton and Sussex University Hospitals, Brighton; J. Kingswood, Brighton and Sussex University Hospitals,



Brighton, S. Lambie, *Raigmore Hospital, Inverness*, I. MacDougall, *King's College Hospital, London*, I. MacPhee, *St. George's Hospital Medical School, London*, A. Maxwell, *Belfast City Hospital, Belfast*, A. Mikhail, *Morrison Hospital, Swansea*, N. Turner, *Royal Infirmary, Edinburgh*, D. Wheeler, *University College Medical School, London*, M. Wilkie, *Royal Hallamshire Hospital, Sheffield*, D. Zehnder, *University Hospital Coventry & Warwickshire NHS Trust, Coventry*; **United States of America**: S. Adler, *Nephrology Associates of Westchester, Hawthorne, NY*, D. Battle, *Northwestern University, the Feinberg School of Medicine, Chicago, IL*, W. Bennett, *Northwest Renal Clinic, Inc., Portland, OR*, B. Berger, *University Hospitals Case Medical Center, Cleveland, OH*, J. Blumenfeld, *The Rogosin Institute, New York, NY*, P. Bolin, *East Carolina University, Greenville, NC*, R. Browder, *Charleston Nephrology Associates, N. Charleston, SC*, A. Chapman, *Emory University, Atlanta, GA*; M. Culpepper, *University of South Alabama, Mobile, AL*, N. Dahl, *Yale University School of Medicine, New Haven, CT*, C. Edelstein, *University of Colorado Health Sciences Center, Aurora, CO*, D. Fischer, *Kidney & Hypertension Center, Cincinnati, OH*, S. Goral, *University of Pennsylvania Medical Center, Philadelphia, PA*, M. Kaplan, *Nephrology Associates, P.C., Nashville, TN*, K. Kaveh, *Coastal Nephrology Associates, LLC, Port Charlotte, FL*, M. Koren, *Jacksonville Center for Clinical Research, Jacksonville, FL*, R. Lafayette, *Stanford University Medical Center, Stanford, CA*, W. Bibb Lamar, *Coastal Clinical Research, Mobile, AL*, J. Lee, *Apex Research of Riverside, Riverside, CA*, R. Mahnensmith, *Yale University Medical School, New Haven, CT*, P. Nachman, *University of North Carolina Kidney Center, Chapel Hill, NC*, R. Perrone, *Tufts Medical Center, Boston, MA*, J. Petersen, *Stanford University Medical Center, Stanford, CA*, J. Radhakrishnan, *Columbia University Medical Center, New York, NY*, M. Roppolo, *Renal Associates of Baton Rouge, Baton Rouge, LA*, M. Rosner, *University of Virginia, Nephrology Clinical Research Center, Charlottesville, VA*, G. Schulman, *Vanderbilt University Medical School, Nashville, TN*, L. Steed, *Northwest Renal Clinic, Inc., Portland, OR*, T. Steinman, *Beth Israel Deaconess Medical Center, Boston, MA*, V. Torres, *Mayo Clinic, Rochester, MN*, J. Tuazon, *Northwestern University, the Feinberg School of Medicine Chicago, IL*, R. Venuto, *Erie County Medical Center, Buffalo, NY*, T. Watnick, *Johns Hopkins School of Medicine, Baltimore, MD*, F. Winklhofer, *University of Kansas Medical Center, Kansas City, KS*.
